# Supplementary material for: Photocatalytic reactive oxygen species generation activity of TiO2 improved by the modification of persistent free radicals
Source: Royal Society of Chemistry journal article supplement (doi:10.1039/d1en00832c), 2021-01-01
Supplement: d1en00832c1.pdf [file d1en00832c1.pdf]

## Supporting Information

### Photocatalytic Reactive Oxygen Species Generation Activity of TiO<sub>2</sub> Improved by The Modification of Persistent Free Radicals

Jianli Liu,<sup>a</sup> Guohui Dong,<sup>\*,a</sup> Jun Jing,<sup>a</sup> Shuyun Zhang,<sup>a</sup> Yu Huang,<sup>b</sup> and Wingkei Ho<sup>c</sup>

<sup>a</sup> School of Environmental Science and Engineering, Shaanxi University of Science and Technology,  
Xi'an 710021, China

<sup>b</sup> Key Laboratory of Aerosol Chemistry and Physics, Institute of Earth Environment, Chinese Academy  
of Sciences, Xi'an 710061, China

<sup>c</sup> Department of Science and Environmental Studies and Centre for Education in Environmental  
Sustainability, The Education University of Hong Kong, Tai Po, N.T. Hong Kong, PR China

\*Corresponding author. Phone: +86-029-86132765.

E-mail: [dongguohui@sust.edu.cn](mailto:dongguohui@sust.edu.cn)

#### **S1. Results and Discussion**

**S1.1 The detail analysis of XRD patterns:** To study the crystal structure of different samples, the X-ray diffraction (XRD) patterns of each sample were analyzed. It can be seen from Figure 1a, all the samples display the same XRD peaks ( $2\theta$ ) at 25.16, 37.77, 47.84, 54.01, 55.07, 62.87, 68.90, 70.40 and 75.06°, which corresponds to the characteristic peaks (101), (103), (004), (112), (200), (105), (211), (204), (116), (220), (215), and (224) of anatase phases (JCPDS 71-1166). With the ageing time increase, the different peaks of TiO<sub>2</sub> become wider and wider, indicating the long ageing time can help decrease the grain size of TiO<sub>2</sub> sample.

**S1.2 The detail analysis of XPS spectra:** To further clear the compositions of different samples, the high resolution elements XPS spectra were analyzed. Figure 2c shows the high resolution Ti 2p XPS spectra of different samples, the Ti 2p XPS spectra of all samples only have two peaks at around 458.3 and 463.9 eV. These two peaks could be ascribed to the Ti 2p<sub>3/2</sub> and Ti 2p<sub>1/2</sub> of Ti(IV), suggesting Ti(III) is not present in all TiO<sub>2</sub> samples. The high resolution C 1s XPS spectra (Figure 2a) of all samples have three peaks at around 284.6, 285.92, and 288.95 eV. According to previous reports, the main peak at 284.6 eV is attributed to the C-C bond with sp<sup>2</sup> orbital, and the peaks at 285.92 and 288.95 eV are assigned to the C-O and COO bonds. These high resolution elements XPS spectra results confirm that the presence of organics on the surface of resulted samples. O 1s XPS spectra of different samples have significant difference. As shown in Figure 2b, the O 1s peaks can be fitted with three peaks at 529.5, 531.1 and 533.2 eV for all samples. These three peaks are related to lattice oxygen of TiO<sub>2</sub>, surface -OH, and adsorbed H<sub>2</sub>O respectively.

**S1.3 The formation process analysis of organics:** TiO<sub>2</sub> precursor (TBOT) has lots of organic ligands (OL), which can be hydrolyzed into butanol, Ti(OH)<sub>4</sub>, or incomplete hydrolysate (Such as OL-Ti(OH)<sub>3</sub>) in the aging process. There is no stirring in the aging process. Therefore, the longer aging time will cause the more complete hydrolysis. Meanwhile, hydrolysates could aggregate with each other and form the gel micelle. In the calcining process, the remanent organic ligands would decompose and form Ti-O-CH<sub>2</sub>-CH<sub>3</sub>, while the butanol would decompose to -CH<sub>2</sub>-CH<sub>2</sub>-OH and -CH<sub>2</sub>-CH<sub>3</sub>. Then, HO-CH<sub>2</sub>-CH<sub>2</sub>- would be oxidized to -CH<sub>2</sub>-COOH, which is a strong electron withdrawing group. This electron withdrawing group could bond with the O terminal of TiO<sub>2</sub> and form Ti-•O-CH<sub>2</sub>-COOH.

**S1.4 The detail analysis of  $\bullet\text{O}_2^-$  spectra:**  $\bullet\text{O}_2^-$  was measured through the electron paramagnetic resonance (EPR) spectroscopy. As shown in Figure S2, no any EPR signal can be found in the EPR spectra of three samples in the dark condition. After 5 min of light illumination, three samples clearly display the characteristic EPR signal of  $\bullet\text{O}_2^-$ . Meanwhile, the intensity of  $\bullet\text{O}_2^-$  signal in 8h-TiO<sub>2</sub> and 12h-TiO<sub>2</sub> samples are more than that in 4h-TiO<sub>2</sub> sample.

**S1.5 Active species scavenger experiment:** Since  $\bullet\text{OH}$  can be produced through both the oxidation of hole and the reduction of electron. KI was chosen as hole scavenger to clear the approach of  $\bullet\text{OH}$  generation over different samples. As shown in Figure 7e, the photocatalytic  $\bullet\text{OH}$  production ability of different samples are inhibited clearly by the addition of KI. The inhibition rates of 4h-TiO<sub>2</sub>, 8h-TiO<sub>2</sub>, and 12h-TiO<sub>2</sub> are 28%, 61%, and 54%, respectively. This result implies that EPFRs may also help holes to take part in the  $\bullet\text{OH}$  production. As we known, the higher surface area may absorb more light or adsorb more electrolyte ions. Meanwhile, the more lights or electrolyte ions will produce the higher photocurrent densities. However, in our experiment systems, the sizes of different working electrodes (different samples) are the same. Therefore, the surface area can be excluded from the influence factors.

**S1.6 Electrochemical property:** Electrochemical impedance spectra (EIS) measurements were carried out to study the internal charge transfer. Figure 6h presents the Nyquist impedance results for Xh-TiO<sub>2</sub> under dark. The smaller radius of the arc implies the higher efficiency of charge transfer. Therefore, 8h-TiO<sub>2</sub> have the best electronic transfer properties among three samples. The photocurrent densities were detected under visible irradiation to investigate the photoelectric conversion properties of different samples. As shown in Figure 6g, all the samples

have rapid photo-response. Among different samples, 8h-TiO<sub>2</sub> shows the highest photocurrent, suggesting that 8h-TiO<sub>2</sub> possesses better photoelectric conversion property than other samples.

**S1.7 The detail analysis of Kelvin probe force microscopy (KPFM):** Kelvin probe force microscopy (KPFM) was employed to test the surface potential of 8h-TiO<sub>2</sub> sample. As shown in Figure S4, the nano-tubes exists on the surface of 8h-TiO<sub>2</sub>, which consists the EPFRs. Importantly, electric potential difference can be evidenced between EPFRs and the bulk of TiO<sub>2</sub>, confirming the existence of built-in electric field.

**S1.8 Photocatalytic NO removal experiments:** Photocatalytic NO removal experiments were carried out in a continuous flow quartz reactor (High = 10 cm, Radius = 5 cm). TiO<sub>2</sub> sample was made into a membrane in a sample dish (High = 1.5 cm, Radius = 3 cm). This sample dish was then put into the middle of the reactor. A 300W XE lamp with certain wavelength filter (420 nm and 550 nm) was selected as the light source. The NO source employed the air stream mixed with 600 ppb of NO gas. This air stream was allowed continuous flowing through the reactor with the flow rate of 1 L min<sup>-1</sup>. The NO concentration during reactions was continuously monitored by a NO<sub>x</sub> analyzer (Thermo Scientific, 42i).

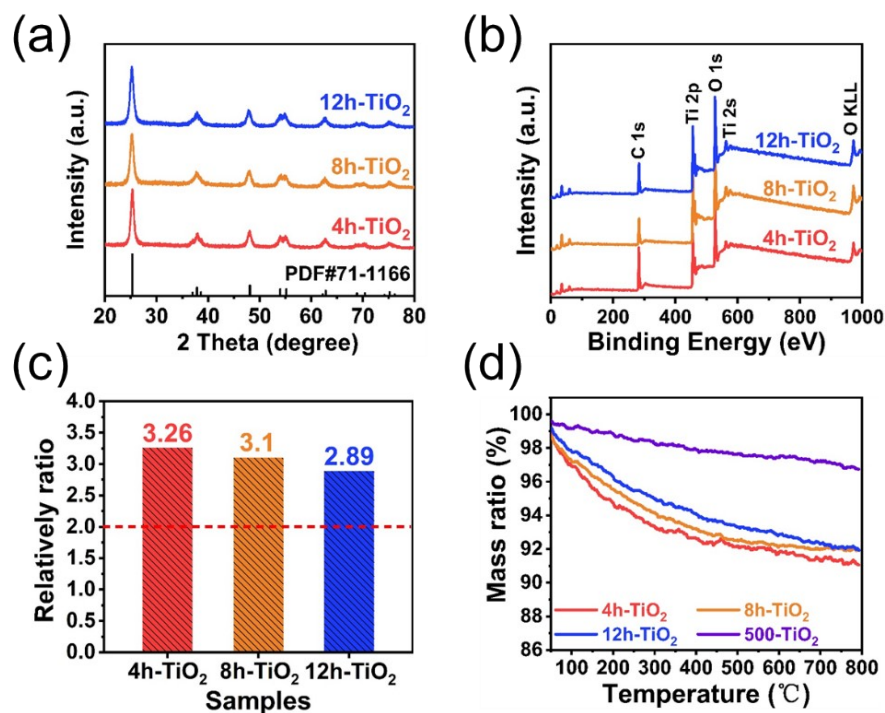

**Figure S1.** XRD patterns of Xh-TiO<sub>2</sub> samples (a); XPS survey spectra of Xh-TiO<sub>2</sub> samples (b); O/Ti ratio of Xh-TiO<sub>2</sub> samples (c); TGA curves of different samples (d).

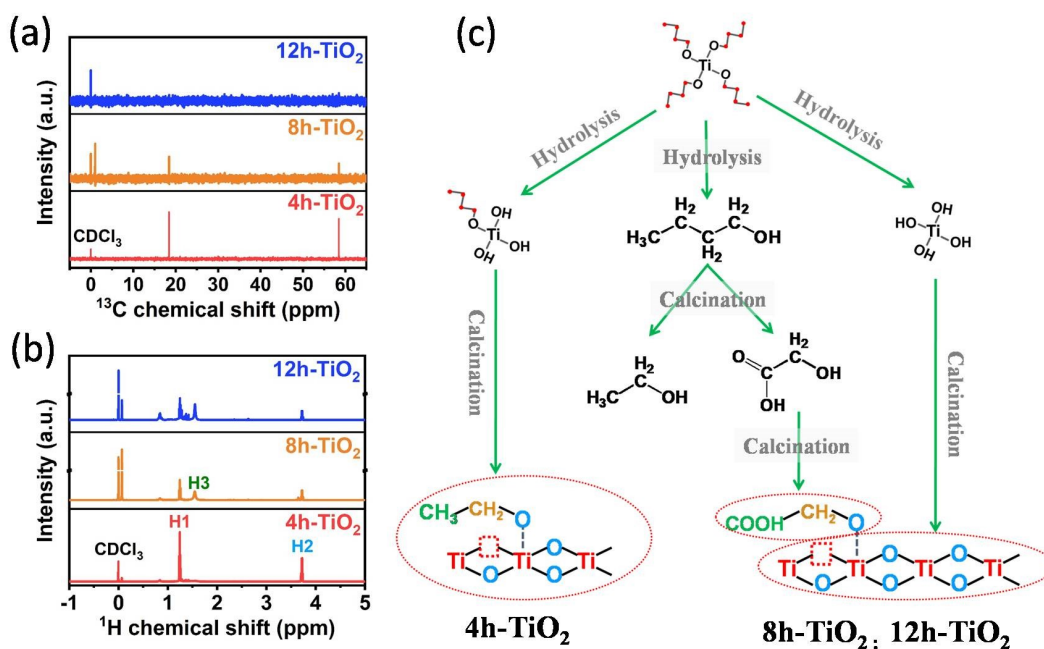

**Figure S2.** <sup>13</sup>C NMR spectra (a) and <sup>1</sup>H NMR spectra (b) of Xh-TiO<sub>2</sub> acquired with 600 MHz spectrometer; Schematic illustration of organics generation (c).

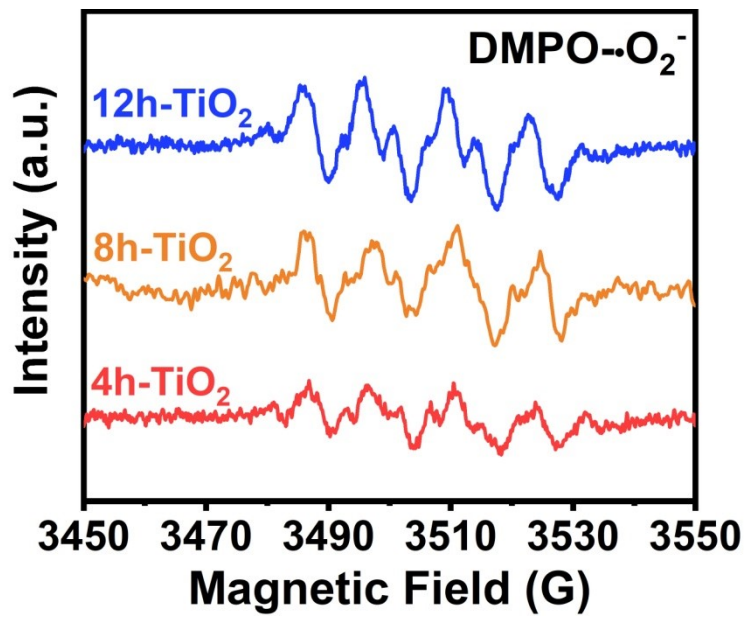

**Figure S3.** ESR spectra of the DMPO- $\text{O}_2^-$  adducts recorded with as-prepared TiO<sub>2</sub> under simulated sunlight irradiation.

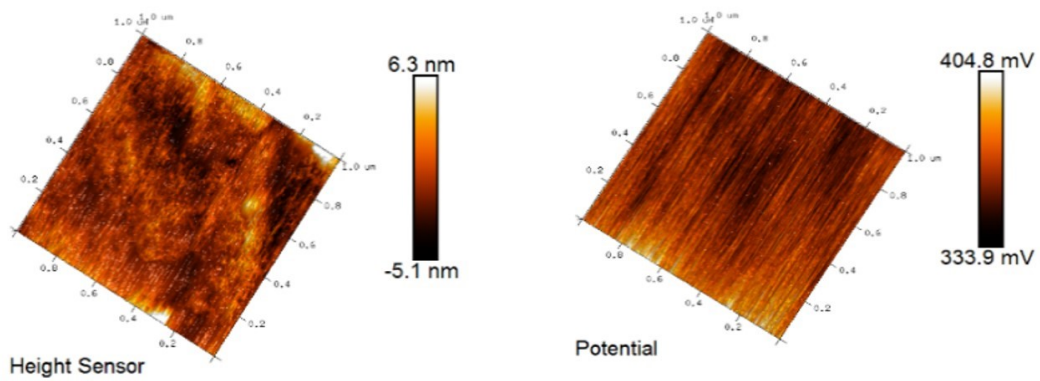

**Figure S4.** KPFM images of 8h-TiO<sub>2</sub>.

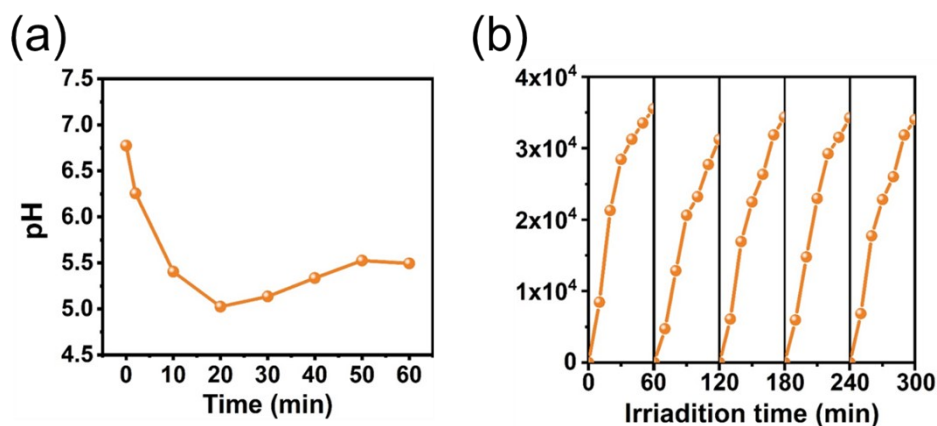

**Figure S5.** (a) pH variation of solution during photocatalytic H<sub>2</sub>O<sub>2</sub> production; (b) Recycling test of 8h-TiO<sub>2</sub> for photocatalytic •OH production.

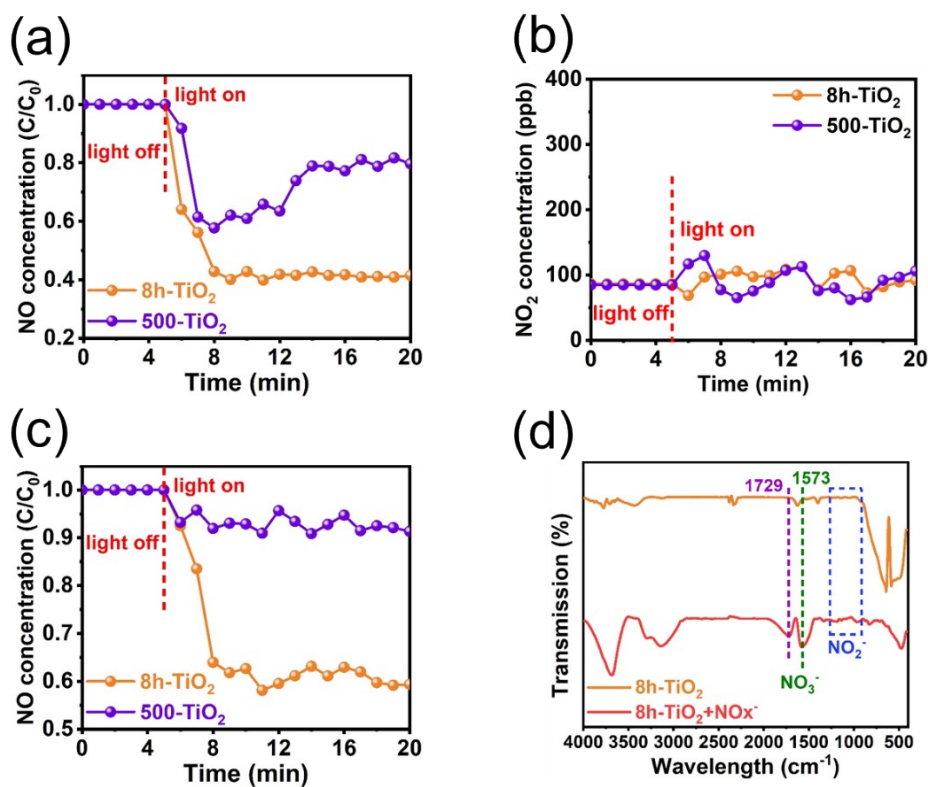

**Figure S6.** (a) The change of NO concentration ( $C/C_0$ ) over 8h-TiO<sub>2</sub> and 500-TiO<sub>2</sub> under visible irradiation; (b) NO<sub>2</sub> concentration changes with increase of irradiation time over 8h-TiO<sub>2</sub> and 500-TiO<sub>2</sub>; (c) The NO removal over 8h-TiO<sub>2</sub> and 500-TiO<sub>2</sub> samples under green light irradiation ( $\lambda=550$  nm); (d) FTIR spectra of 8h-TiO<sub>2</sub> before and after NO removal experiment.
